# Supplementary material
Source: Springer Nature journal article supplement (https://www.springermedizin.de/resource/supplementary/12875_2012_876_MOESM1_ESM.pdf/9435720)
Supplement: MOESM1 [file 9435720]

STUDY POPULATION  
9,200 persons ≥65 years

“Peñagrande sample, 2011”  
(N=941)  
(Peñagrande cohort = 814 plus 127  
persons age 65-68)

Cuatro Caminos representative  
sample, 2011  
(N=1,250)

Not eligible<sup>1</sup>  
(N= 186)

Eligible  
(N= 755)

Eligible  
(N= 1005)

Not eligible<sup>1</sup>  
(N= 245)

STUDY SAMPLE  
N=1,760

PARTICIPATED  
(N=1,327)  
(Response rate 75.4%)

Refusals  
(N=413)

| Age group (years) | Total<br>N=1,327 | Men<br>N=619 (46.6%) | Women<br>N=708 (53.4%) |
|-------------------|------------------|----------------------|------------------------|
| 65- 69            | 231 (17.4%)      | 101 (7.6%)           | 130 (9.8%)             |
| 70- 74            | 292 (22.0%)      | 140 (10.6%)          | 152 (11.5 %)           |
| 75-79             | 283 (21.3%)      | 141 (10.6%)          | 142 (10.7 %)           |
| 80-84             | 268 (20.2%)      | 128 (9.6 %)          | 140 (10.6 %)           |
| 85-89             | 177 (13.3%)      | 79 (6%)              | 98 (7.4 %)             |
| ≥= 90             | 76 (5.7 %)       | 30 (2.3 %)           | 46 (3.5 %)             |

<sup>1</sup>Population not eligible: persons who had died, changed address or could not be located.
